# Supplementary material
Source: PubMed Central journal article supplement (PMC1838663)

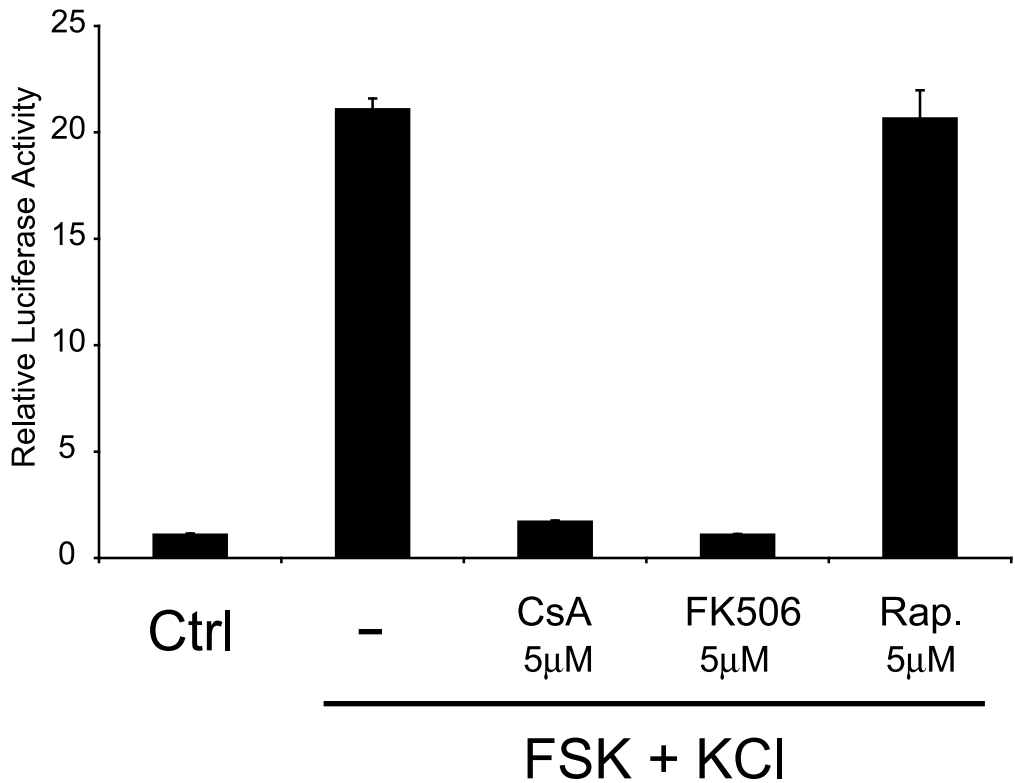

Supplement: pnas_0607524104_1.pdf [file pnas_0607524104_1.pdf]

**A**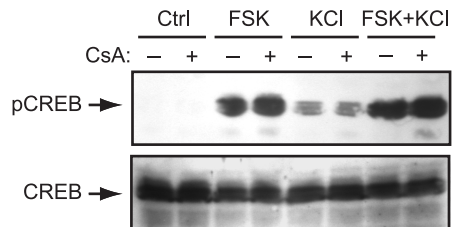**B**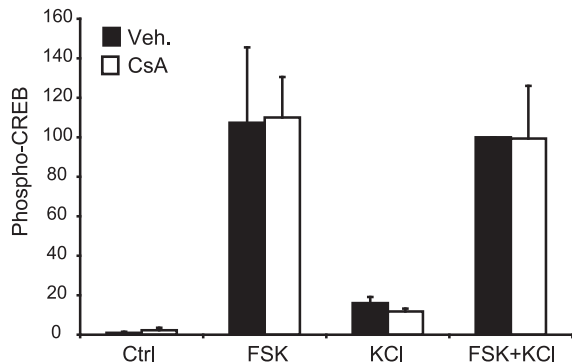**C**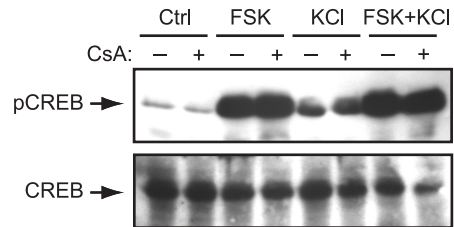**D**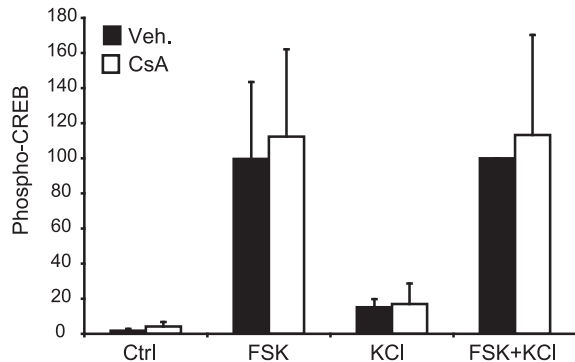

Supplement: pnas_0607524104_2.pdf [file pnas_0607524104_2.pdf]

**A**

Ctrl shRNA  
T1 shRNA  
T2 shRNA

TORC1-myc

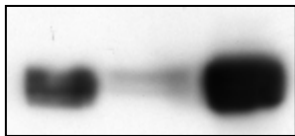**B**

Ctrl shRNA  
T1 shRNA  
T2 shRNA

FLAG-TORC2

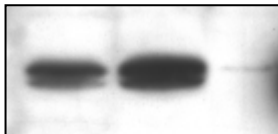

Supplement: pnas_0607524104_3.pdf [file pnas_0607524104_3.pdf]

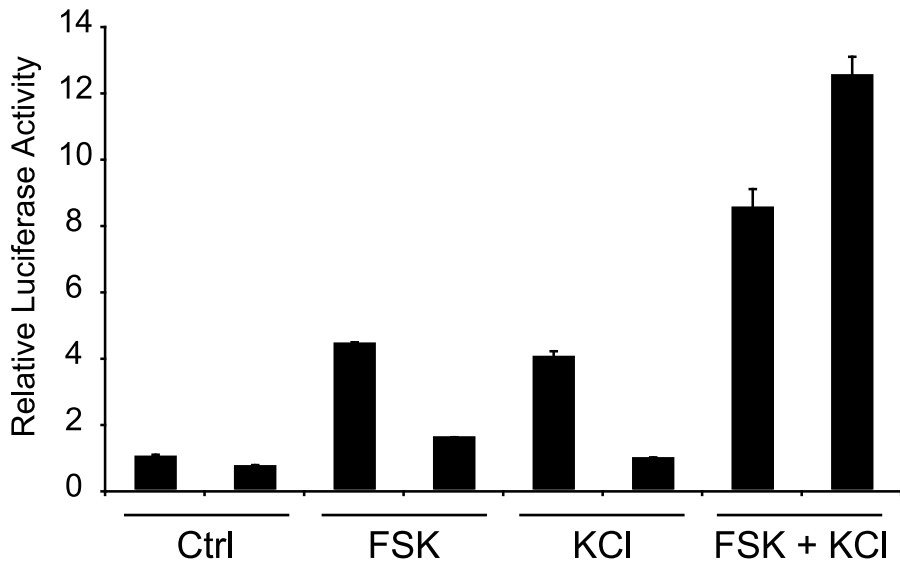

|                         | Ctrl |   | FSK |   | KCl |   | FSK + KCl |   |
|-------------------------|------|---|-----|---|-----|---|-----------|---|
| TTX (1 $\mu$ M)         | -    | + | -   | + | -   | + | -         | + |
| APV (100 $\mu$ M)       | -    | + | -   | + | -   | + | -         | + |
| CNQX (40 $\mu$ M)       | -    | + | -   | + | -   | + | -         | + |
| Nifedipine (10 $\mu$ M) | -    | + | -   | + | -   | - | -         | - |
| H89 (20 $\mu$ M)        | -    | + | -   | - | -   | + | -         | - |

Supplement: pnas_0607524104_4.pdf [file pnas_0607524104_4.pdf]
